# Supplementary material for: Porcine circovirus 2 (PCV-2) genotype update and proposal of a new genotyping methodology
Source: PubMed Central journal article supplement (PMC6283538; doi:10.1371/journal.pone.0208585), 2018-12-06

# Genotype-Host association

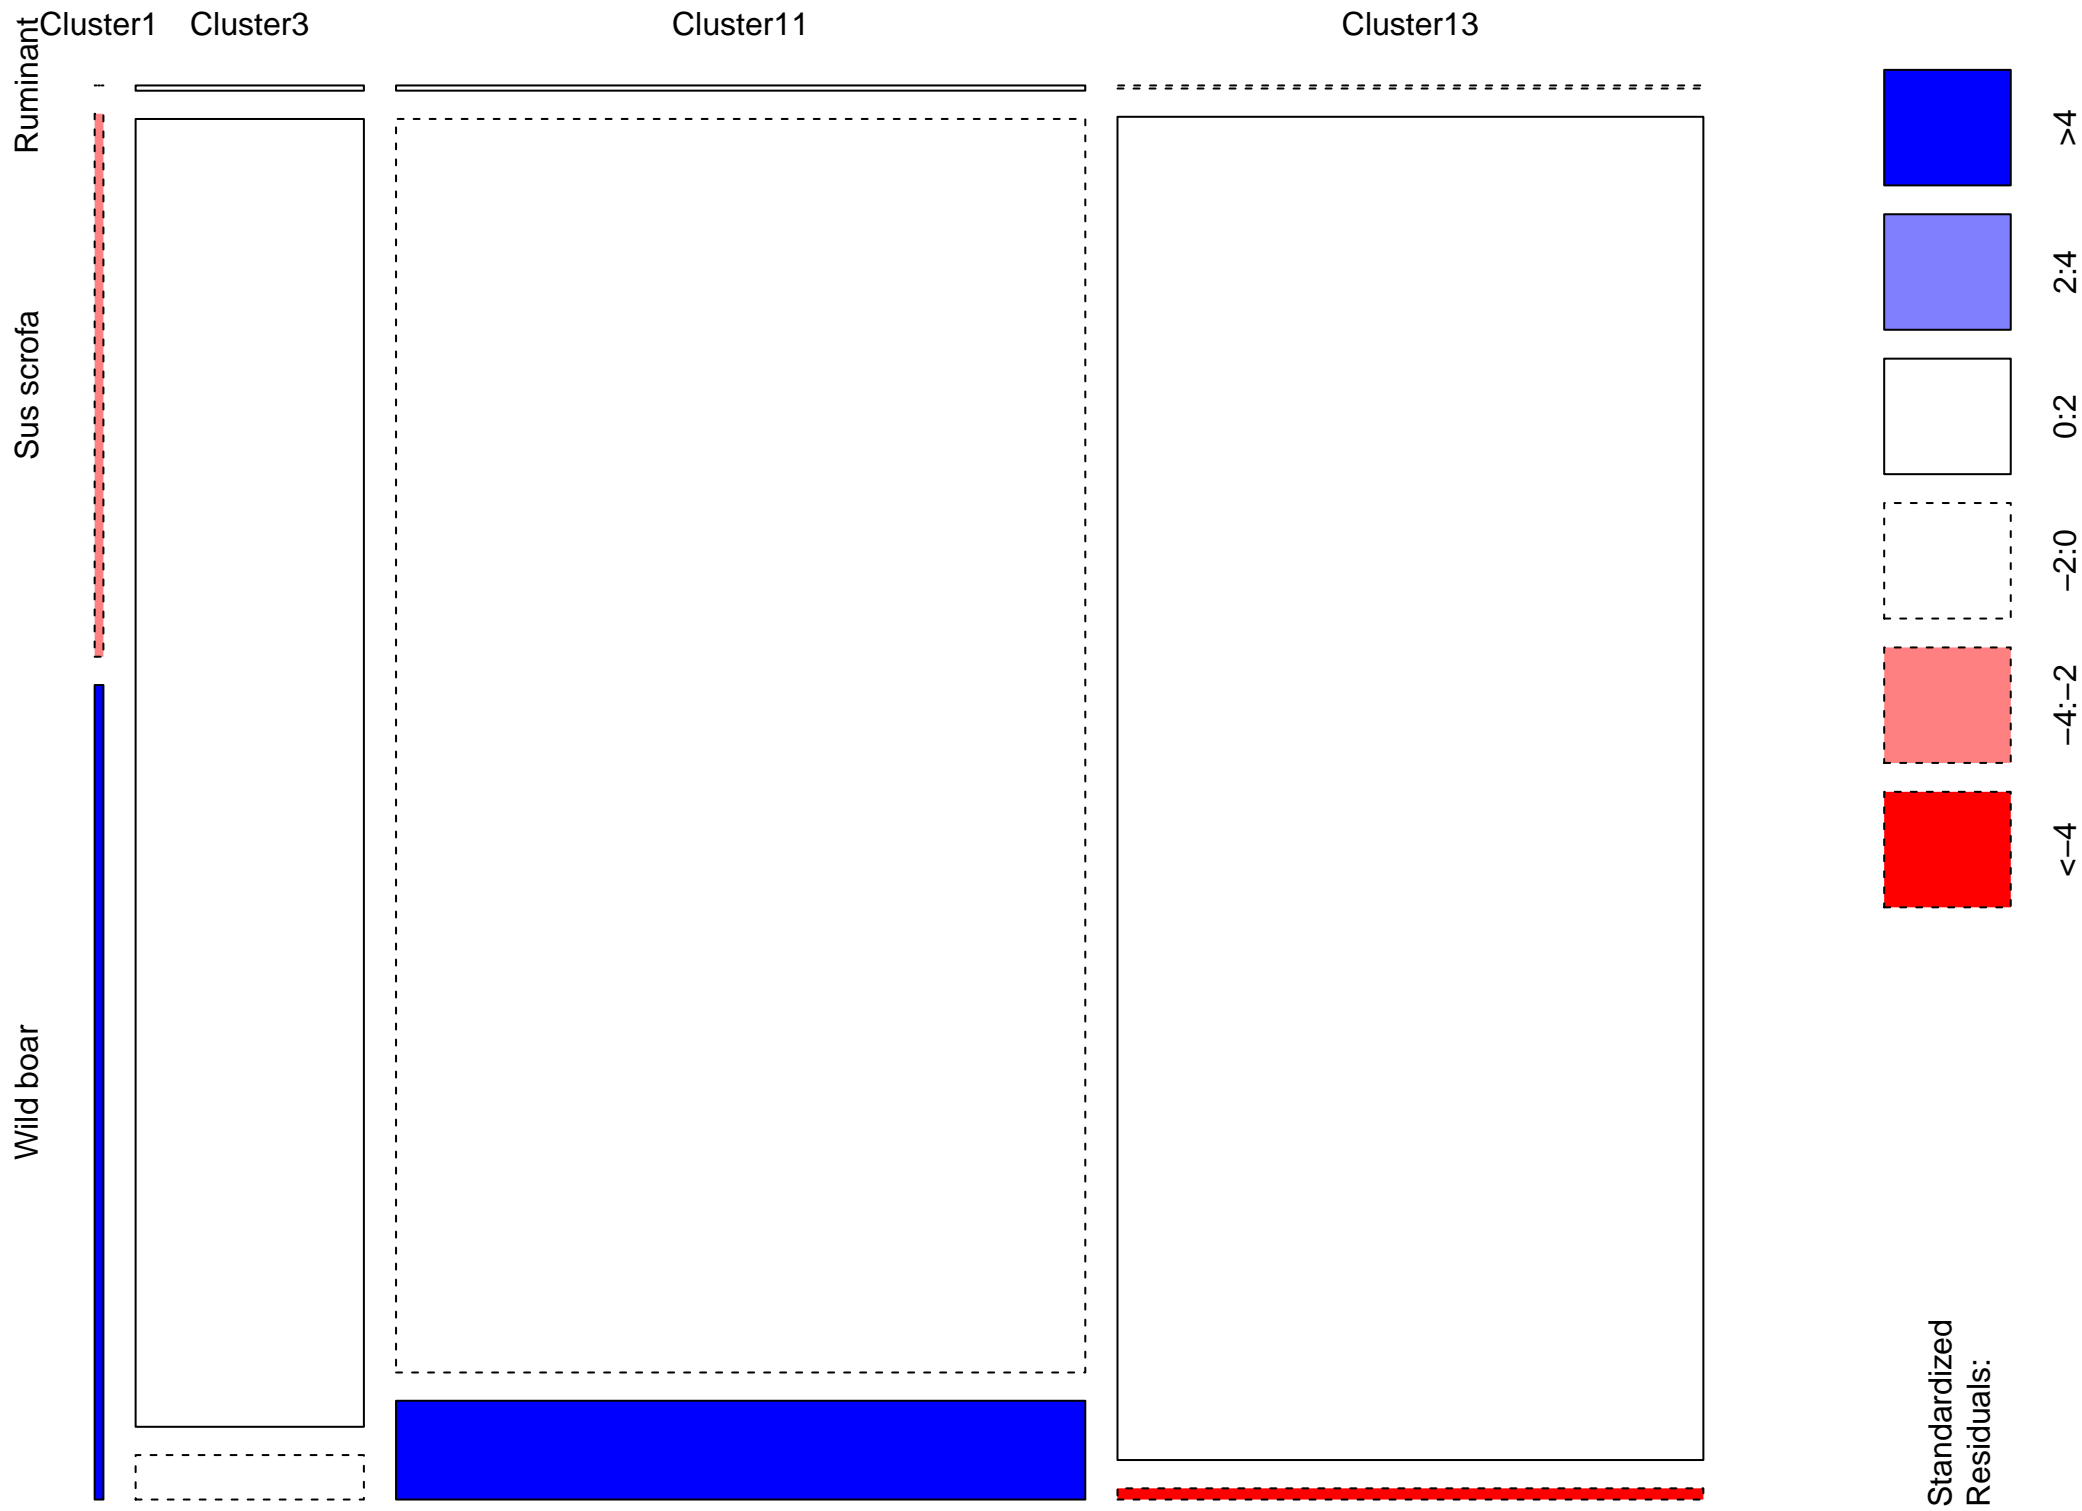

Supplement: pone.0208585.s002.pdf [file pone.0208585.s002.pdf]
