# Supplementary material for: Porcine circovirus 2 (PCV-2) genotype update and proposal of a new genotyping methodology
Source: PubMed Central journal article supplement (PMC6283538; doi:10.1371/journal.pone.0208585), 2018-12-06
Supplement: pone.0208585.s003.pdf [file pone.0208585.s003.pdf]

ORF2 Sequencing

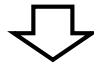

Chromatogram quality evaluation

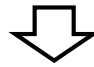

Alignment with reference sequences  
(Codon level; e.g. TranslatorX)

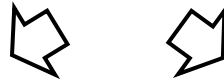

Reduced dataset  
(Fig. 2)  
(Fast)

Complete dataset  
(Supplementary data)  
(Accurate)

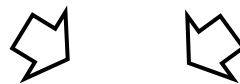

Neighbor joining tree  
(p-distance; bootstrap support)  
ClusterPicker cluster evaluation

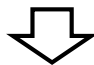

Intra cluster distance <13%  
Bootstrap support >70

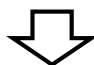

Yes

No

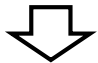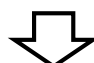

Previously  
described  
genotype

Compare with updated  
Genbank records

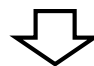

New cluster  
bootstrap support >70  
& >15 sequences

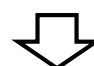

Yes

No

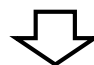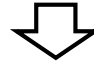

New genotype

Unclassified
